# Supplementary material
Source: PubMed Central journal article supplement (PMC7612858)
Supplement: EMS145265-supplement-Supplementary_Material.pdf [file EMS145265-supplement-Supplementary_Material.pdf]

---

**Supplementary information**

---

**Surface-tension-induced budding drives  
alveologenesis in human mammary gland  
organoids**

---

In the format provided by the  
authors and unedited

## Appendix A: Supplementary Experimental Results

### 1. Movies

**Supp. Movie 1** Cylindrical branches flow into the organoid body after hydrolysis of the collagen matrix.

**Supp. Movie 2** Laser ablation of organoids for branches grown in the attached (left) and floating configuration (right).

**Supp. Movie 3** Laser ablation in presence of Cytochalasin D.

**Supp. Movie 4** Representative examples of cell dynamics over one day. All organoids stem from the same donor (M25) and were grown in floating gels. Notice that branch shape correlates strongly with the type of motion: axial translation in cylindrical branches, rotation in nascent and mature alveoli.

**Supp. Movie 5** Long time observation of cell dynamics shows that alveologenesis and collective cell rotation are correlated (donor: M28).

**Supp. Movie 6** Addition of HECD1 antibody against E-cadherin abolishes alveolar rotation within 15–25 hours (donor: M25).

**Supp. Movie 7** Cell dynamics at 25X magnification. This experiment corresponds to Supplementary Fig. 4a (donor: M25).

**Supp. Movie 8** Cell dynamics at 25X magnification. This experiment corresponds to Supplementary Fig. 4b (donor: M25).

### 2. Donors

| Donor | Age (years) | Parity | Alveoli (%) | n   |
|-------|-------------|--------|-------------|-----|
| M20   | 67          | 2      | 30          | 80  |
| M25   | 22          | 0      | 69          | 133 |
| M26   | 34          | 2      | 60          | 78  |
| M28   | 38          | 1      | 57          | 106 |

Table I. Age, parity, and frequency of alveoli occurrence at days 11-13 and number of branches analysed.

21

### 3. Collagen “cage”

22 Confocal microscopy of organoids grown in fluorescent collagen shows that organoid  
 23 branches are surrounded by a thin, dense shell of collagen, which results from an irreversible  
 24 compaction of the bulk collagen matrix due to active cell contractility. This “collagen cage”  
 25 is thinner at the organoid branch tips and approaches a thickness of up to  $h = 10 \mu\text{m}$  towards  
 26 the organoid body [1].

27 To determine whether the cage is also present around spherical alveoli, organoids were  
 28 cultivated for two weeks in floating gels of collagen I conjugated with Atto 488. Confocal  
 29 imaging of both cylindrical branches and spherical alveoli was done using a Leica SP8 con-  
 30 focal microscope and a 40X/1.1 water immersion objective. Subsequently, we measured the  
 31 fluorescence intensity of the collagen network close to the tip of the branches and normal-  
 32 ized on the maximum background. We found indeed a layer of strong fluorescence around  
 33 spherical alveoli [Supplementary Fig. 1]. This suggests that the formation of the alveolus  
 34 displaces the preexisting collagen cage, inducing a plastic strain of the surrounding ECM as  
 35 the organoid surface pushes against it. As a corollary, a proteolytic mechanism for alveolo-  
 36 genesis - one that would require the dissolution of the fluorescent collagen - seems unlikely.

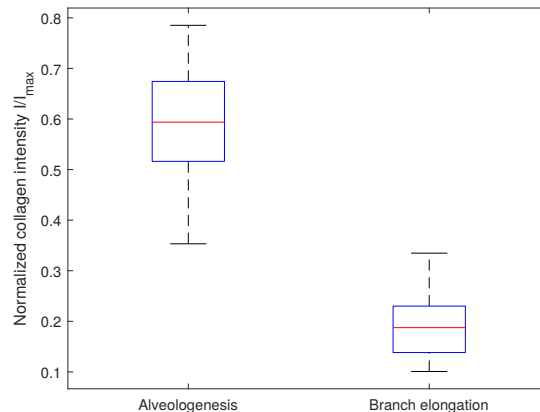

Supplementary Fig. 1. Intensity of the fluorescent collagen cage surrounding spherical alveoli ( $n = 15$ ) and elongating cylindrical branches ( $n = 12$ )

37

#### 4. Organoid ablation in the presence of Cytochalasin D

38 Laser ablation of organoid branches induces a fast recoil of the organoid tissue surrounding  
 39 the cut. To confirm that this response is due to forces generated by the actomyosin system,  
 40 we performed experiments in presence of Cytochalasin D (CD), which is known to disrupt  
 41 actin organization [2]. We incubated organoids with CD at a concentration of 4  $\mu$ M for  
 42 30 min, stained membranes with CellMask for 10 min, and replenished medium containing  
 43 CD to perform ablation experiments. We found that the recoil response was no longer axially  
 44 biased and the average strain was significantly lower in the presence of CD (Supplementary  
 45 Fig. 2). This corroborates that the laser ablation experiments probe cortical tension and  
 46 that the anisotropy of the response requires an intact actin cytoskeleton.

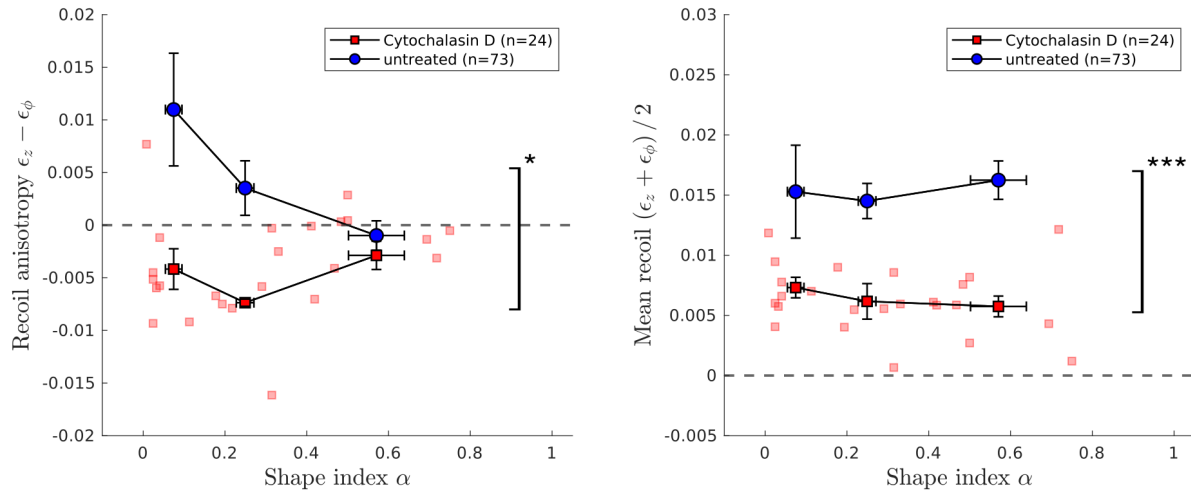

Supplementary Fig. 2. Recoil anisotropy  $\epsilon_z - \epsilon_\phi$  and mean recoil  $(\epsilon_z + \epsilon_\phi)/2$  as a function of index shape  $\alpha$  in presence of Cytochalasin D (red squares). All organoids were grown in floating gels; control points are a replotting of the data shown in Fig. 2c,d (blue circles).

## 5. Cell boundary segmentation

Stained cell membranes were analysed with the Multicut segmentation tool included in the Ilastik software [3], which decomposes the image into closed regions without dangling edges. The respective boundaries of the cells were traced with a custom Python script. To characterize whether there is an orientational order in the cell population (i.e. a nematic order), we discretized the (smooth) cell boundaries into straight subsegments and computed the histogram of subsegment angles relative to the branch axis angle  $\theta_0$ . We found that cell boundaries in attached gels are highly biased towards the branch axis, and become increasingly isotropic as the shape index increases (Supplementary Fig. 3). Branches with  $\alpha = 0.3$  are already very close to an isotropic distribution of cell boundaries.

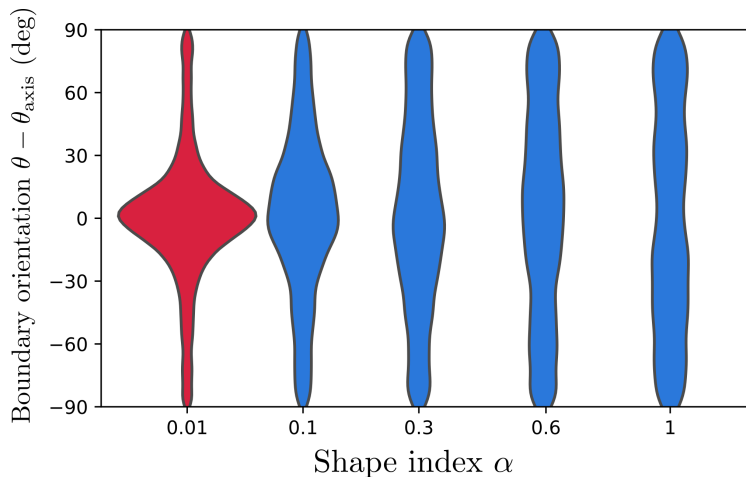

Supplementary Fig. 3. Distribution of cell boundary angles  $\theta$  relative to the branch axis  $\theta_0$  ( $n=42$  organoids) as a function of shape index  $\alpha$  for attached (red) and floating gels (blue).

## 6. Force inference

From the segmented images we sought to estimate the surface tension tensor  $\boldsymbol{\tau}$ . To that end, we first computed the line tensions acting along individual cell boundaries using the method of force inference developed by Wayne Brodland et al. [4]. This elegant approach assumes a 2D vectorial force balance at every junction of boundaries, providing two scalar equations per junction for a number of unknown line tensions equal to that of boundaries. Arrangements of cells with high connectivity then give an overdetermined homogeneous system of equations. To avoid the trivial zero solution, the equation system is made hetero-

65 geneuos by adding an equation that imposes a mean line tension equal to 1. The full system  
 66 is solved by linear least squares. In this way, we obtained (relative) line tensions  $\gamma_i$  for each  
 67 cell boundary.

68  
 69 To obtain the surface tension tensor, we must integrate the contributions from each bound-  
 70 ary. Specifically, the mean stress tensor in a body can be obtained from the forces acting  
 71 along its boundary as follows [5]:

$$\bar{\boldsymbol{\tau}} = \frac{1}{2A} \oint dl \left[ \mathbf{f} \otimes \mathbf{x} + (\mathbf{f} \otimes \mathbf{x})^T \right], \quad (\text{A1})$$

72 where  $\mathbf{x}$  refers to the position vectors of each boundary point that is subject a force  $\mathbf{f} dl$ ,  
 73 and  $A$  refers to the area of the body. Here, we used a computational scheme that, in  
 74 the end, reproduced an expression that is analogous to Eq. (A1). First, we divided each  
 75 boundary into subsegments of constant length  $l = 1 \mu\text{m}$ , where segment  $j$  of boundary  $i$  is  
 76 oriented in the direction  $\theta_{ij}$  relative to the tube axis  $\theta_0$ . Then, we summed the line tensions  
 77 of all subsegments that point along a given angle  $\theta$  to obtain the total force distribution  
 78  $F(\theta) = \sum_{\theta_{ij}=\theta} \gamma_i$ . The corresponding force vector is given by  $F(\theta) \hat{\mathbf{e}}_\theta$ , where  $\hat{\mathbf{e}}_\theta = (\cos(\theta -$   
 79  $\theta_0), \sin(\theta - \theta_0))$  refers to the *unit* vector corresponding to the angle relative to the tube axis,  
 80  $\theta - \theta_0$ . Then, the average tension tensor is proportional to

$$\boldsymbol{\tau} \propto \oint d\theta F(\theta) \hat{\mathbf{e}}_\theta \otimes \hat{\mathbf{e}}_\theta. \quad (\text{A2})$$

81 Since the line tension is assumed to be constant along each boundary, the total force distri-  
 82 bution is symmetric with respect to  $\theta \rightarrow \theta + \pi/2$ . Thus, we calculated the *normalized* axial  
 83 stress component as follows:

$$\tau_z = \int_{\theta_0 - \pi/2}^{\theta_0 + \pi/2} d\theta F(\theta) \cos^2(\theta - \theta_0) / \int_{\theta_0 - \pi/2}^{\theta_0 + \pi/2} d\theta F(\theta) / 2, \quad (\text{A3})$$

84 where the normalization factor ensures that the stress is adimensional and equal to 1 for  
 85 a uniform stress distribution. Our choice of normalization is justified by the observation  
 86 that the mean recoil  $(\epsilon_z + \epsilon_\phi)/2$  in our laser ablation experiments remained approximately  
 87 constant for all organoid shapes, cf. Supplementary Fig. 2. A similar equation holds for the

88 circumferential tension:

$$\tau_\phi = \int_{\theta_0-\pi/2}^{\theta_0+\pi/2} d\theta F(\theta) \sin^2(\theta - \theta_0) / \int_{\theta_0-\pi/2}^{\theta_0+\pi/2} d\theta F(\theta)/2. \quad (\text{A4})$$

## 89 7. Nuclear anisotropy parameter: an alternative measurement of cellular tension

90 The shapes of nuclei closely follow the surrounding cell boundaries. We found that  
 91 nuclei shape could be used to obtain an approximate estimate of the tension anisotropy  
 92  $\tau_z - \tau_\phi$  determined by force inference, while offering the advantages of less phototoxicity and  
 93 allowing for precise observation of cell movement. A similar approach was recently discussed  
 94 and validated by Kong *et al* [6]. Following branch dynamics over 10–20 hours, we found  
 95 that the nuclear anisotropy parameter  $\chi$  is large and constant in stable cylindrical branches  
 96 [Supplementary Fig. 4a]. It robustly decreases shortly before an alveologenic increase in  
 97 shape index (main text, Fig. 3f), but it can also be seen to increase prior to a reversal  
 98 of alveologensis, as the branch resumes longitudinal motion towards the organoid body  
 99 (Fig. 4b,  $t = 10$  h).

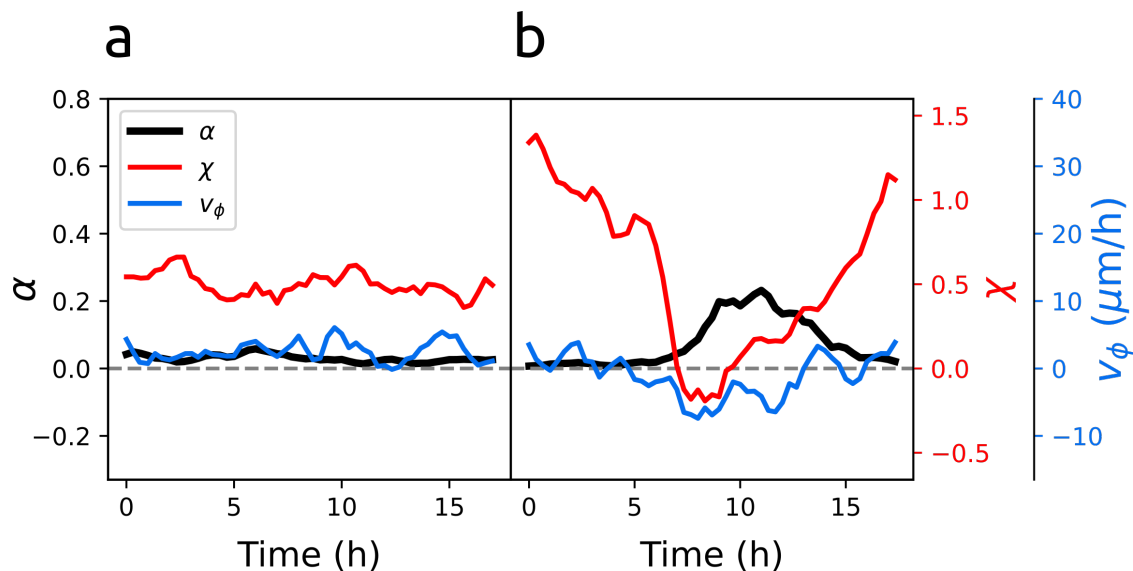

Supplementary Fig. 4. Shape index  $\alpha$ , rotation velocity  $v_\phi$  and nuclear anisotropy parameter  $\chi$  as a function of time for two different experiments. **a**, Data corresponding to Supplementary Movie 7. **b**, Data corresponding to Supplementary Movie 8.

100 Plotting the replica-averaged nuclear anisotropy parameter as a function of the shape  
 101 index, we could compare dynamic data with the results of (static) laser ablation and force

102 inference experiments [Supplementary Fig. 5]. We found a good agreement between all  
 103 datasets, suggesting that the contrasting morphologies of organoids grown in attached and  
 104 floating gels can be understood in terms of the same underlying physics.

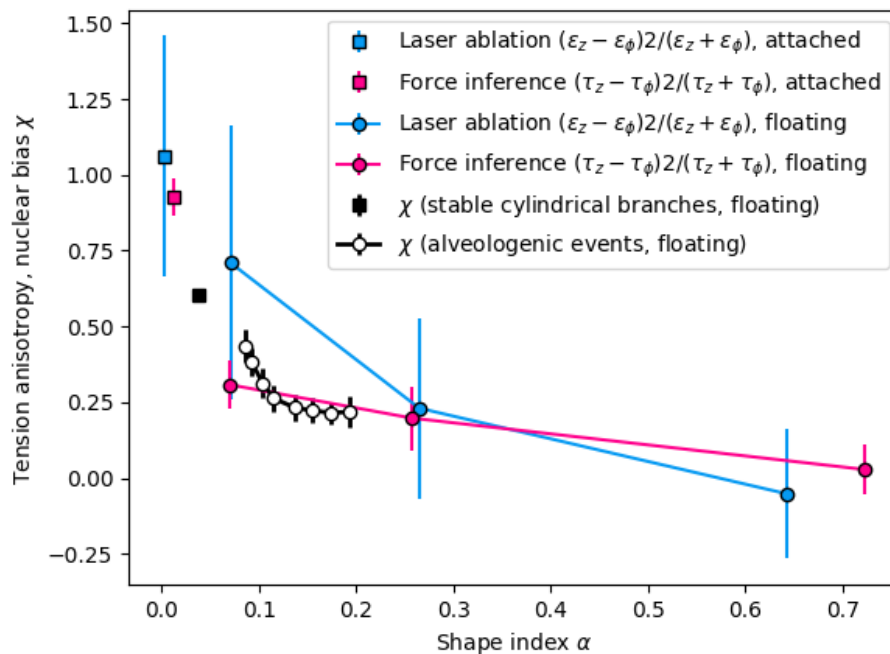

Supplementary Fig. 5. Comparison between laser ablation, force inference and nuclear anisotropy (dynamic) data. Laser ablation and force inference data are replotted from Figs. 2d,h; Nuclear anisotropy data from Fig. 3f.

105

## 8. Rotation of alveoli for several donors

106

107

108

109

110

111

112

113

The rotational motion of mammary gland organoid branches is largely determined by the branch shape, and the shape index  $\alpha$  suffices to characterize this dependency. Branches undergoing translational motion have indexes below 0.3, whereas branches displaying persistent rotation for at least 5 hours have indexes above 0.2 [Supplementary Fig. 6].

To determine the generality of alveolar rotation, we counted the number of branches that showed a sustained rotation around their axis for at least 5 h. For the 4 donors under study, we found that 70%-80% of branches with  $\alpha > 0.3$  rotated, whereas most cylindrical branches moved longitudinally (Supplementary Fig. 7).



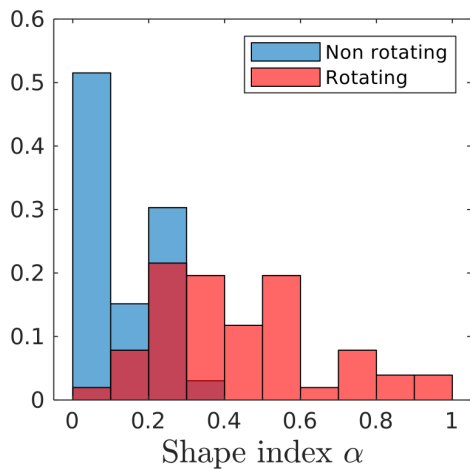

Supplementary Fig. 6. Histogram of shape index  $\alpha$  for branches classified as either translating or rotating according to the dominant cell movement mode for 5 hours. Donor: M26.

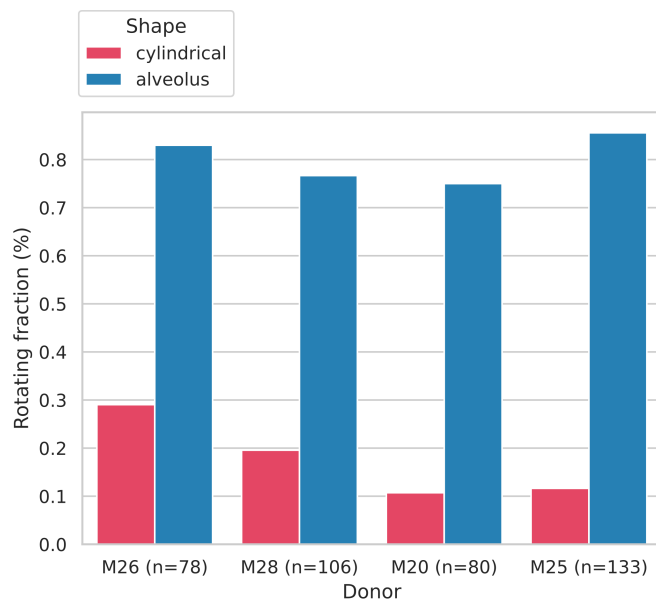

Supplementary Fig. 7. Frequency of rotation in cylindrical branches ( $\alpha \leq 0.3$ , red) and alveoli ( $\alpha \geq 0.3$ , blue) for all donors studied (see Supplementary Table 1 for branch sample size).

## Appendix B: Supplementary Theoretical Discussion

In the following, we present and discuss in detail our mechanical model of organoid branches. We consider an organoid branch as a shell-like cylindrical tissue, where cell contractility confers an anisotropic surface tension. The lumen of the organoid branch is filled by a viscous fluid, while on the outside it is enveloped by an elastic collagen cage as well as an elastic extracellular matrix. Our theoretical analysis shows that the initial cylindrical shape of an organoid branch becomes unstable against long-wavelength perturbation modes when the circumferential component of the anisotropic surface tension exceeds a critical value. This critical circumferential tension is determined by the elastic properties of the collagen cage and the extracellular matrix. In contrast to the circumferential tension, the axial tension penalizes short-wavelength modes and thus only affects the wavelength of the fastest-growing mode, but not the onset of the shape instability itself.

After choosing a suitable (i.e. cylindrical) coordinate system, we discuss the mechanical stresses that act on organoid branches: active cell contractility, passive bending of the collagen cage and deformations of the extracellular matrix. Since viscous stresses asymptotically vanish if the dynamics of the organoid branch is sufficiently slow, the applied mechanical stresses determine whether a tubular shape is stable or not. To then find conditions under which a tubular conformation becomes mechanically unstable, we consider linear shape perturbations of a tubular shell that has a homogeneous initial radius and vanishing mechanical stress (mechanical steady state). Then, by expanding our theory beyond this linear regime and considering nonlinear contributions to the mechanical stress, we investigate how an organoid branch responds to an increase in surface tension.

### 1. Choice of coordinate system

We describe an organoid branch as a thin tubular shell that consist of contractile cells, and use a cylindrical coordinate system  $(r, z, \phi)$ , where the  $z$ -axis is aligned with the centerline of the tube,  $r$  measures the radial distance from the centerline, and  $\phi$  is the azimuthal angle [Supplementary Fig. 8]. For the sake of simplicity, we restrict ourselves to a rotationally symmetric geometry, so that  $\partial_\phi Q(z, \phi) \equiv \partial_\phi Q(z) = 0$  for any (scalar, vectorial or tensorial) quantity  $Q(z, \phi)$ .

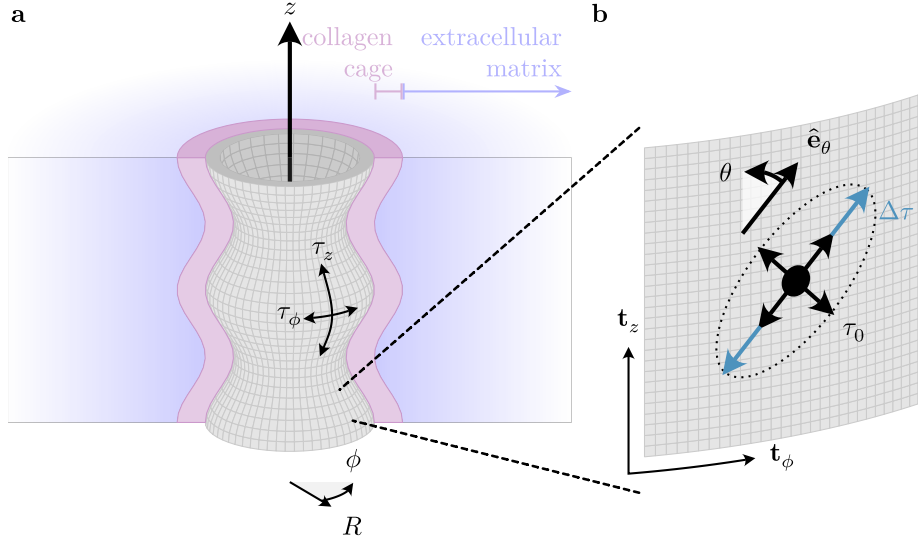

Supplementary Fig. 8. Schematic representation of the organoid branch geometry. **a)** The cell population forms a thin tubular shell (gray), whose lumen is filled by an aqueous solution under hydrostatic pressure  $p_0$ . On the outside, the cellular tube is surrounded by a dense and rigid collagen cage (magenta). Further away, the cellular tube is surrounded by a soft extracellular matrix (blue). **b)** Enlarged view of the cell population that forms the surface of the organoid branch. Each cell (within the local tangent plane) is oriented at an angle  $\theta$  relative to the local axial tangent vector  $\mathbf{t}_z$ , with corresponding orientation vector  $\hat{\mathbf{e}}_\theta$ . We consider each cell as a contractile force dipole. To conceptually illustrate how such a contractile force dipole acts, one can envision an idealized cell with diameter  $d_0$  and area  $A_0$  (black circle). The cell cytoskeleton exerts contractile forces on the cell boundary, which we decompose into two contributions: (i) Isotropic contractile forces  $f_0$  correspond to an isotropic tension  $\tau_0 \equiv f_0 d_0 / A_0$  (black arrows). (ii) In addition, the contractile cell breaks rotational symmetry in this local frame of reference by increasing contractility ( $\Delta f > 0$ ) or decreasing contractility ( $\Delta f < 0$ ) along its axis  $\hat{\mathbf{e}}_\theta$ . Therefore, in addition to the isotropic part of cell tension, there is also an anisotropic contribution  $\Delta\tau \equiv \Delta f d_0 / A_0$ .

143 The tubular shell is located at a distance  $r = R(z)$  from the centerline, where it forms an  
 144 interface between the viscous fluid in the lumen of the organoid branch and the extracellular  
 145 matrix outside of the organoid. We parameterize this interface by the two coordinates  $(z, \phi)$   
 146 and the corresponding position vector field

$$\mathbf{R}(z, \phi) = \begin{bmatrix} R(z) \cos \phi \\ R(z) \sin \phi \\ z \end{bmatrix}. \quad (\text{B1})$$

147 The two (orthogonal but non-normalized) tangent vectors that span the surface of the tubu-

148 lar shell are given by

$$\mathbf{t}_z = \begin{bmatrix} \partial_z R(z) \cos \phi \\ \partial_z R(z) \sin \phi \\ 1 \end{bmatrix}, \quad \text{and} \quad \mathbf{t}_\phi = \begin{bmatrix} -R(z) \sin \phi \\ R(z) \cos \phi \\ 0 \end{bmatrix}. \quad (\text{B2})$$

149 In the following, we usually omit the argument of the tube radius,  $R(z) \equiv R$ , to keep the  
 150 expressions concise. To measure arc distances on the surface of the tubular shell in terms of  
 151 the coordinates  $(z, \phi)$ , we use the metric tensor  $g_{ij} = \mathbf{t}_i \cdot \mathbf{t}_j$  [7]:

$$\mathbf{g} \equiv \begin{bmatrix} g_{\phi\phi} & g_{\phi z} \\ g_{\phi z} & g_{zz} \end{bmatrix} = \begin{bmatrix} R^2 & 0 \\ 0 & 1 + (\partial_z R)^2 \end{bmatrix}. \quad (\text{B3})$$

152 We complete the local coordinate system that spans the surface of the tubular shell by  
 153 introducing the (outward pointing) *unit* normal vector,  $\hat{\mathbf{n}} = (\mathbf{t}_\phi \times \mathbf{t}_z) / \sqrt{\det \mathbf{g}}$ , which lies  
 154 perpendicular to the surface:

$$\hat{\mathbf{n}} = \frac{1}{[1 + (\partial_z R)^2]^{\frac{1}{2}}} \begin{bmatrix} \cos \phi \\ \sin \phi \\ -\partial_z R \end{bmatrix}. \quad (\text{B4})$$

155 Thus, to summarize, we have defined a local coordinate system on the surface of the tubular  
 156 shell, which is parameterized by the coordinates  $(z, \phi)$  and spanned by the two tangent  
 157 vectors  $(\mathbf{t}_z, \mathbf{t}_\phi)$  as well as the normal vector  $\hat{\mathbf{n}}$ .

158 Next, we determine the shape tensor,  $h_{ij} = \hat{\mathbf{n}} \cdot \partial_i \mathbf{t}_j$ , which describes the geometrical shape  
 159 of the tubular shell [7]. Specifically, one can directly read off the two principal curvatures of  
 160 the tubular shell from the following expression:

$$\mathbf{h} \cdot \mathbf{g}^{-1} = \begin{bmatrix} -\frac{R^{-1}}{[1 + (\partial_z R)^2]^{\frac{1}{2}}} & 0 \\ 0 & \frac{\partial_z^2 R}{[1 + (\partial_z R)^2]^{\frac{3}{2}}} \end{bmatrix} \equiv \begin{bmatrix} \kappa_\phi & 0 \\ 0 & \kappa_z \end{bmatrix}. \quad (\text{B5})$$

161 As explained above, we view the organoid branch as a rotationally symmetric cylinder that  
 162 is parameterized by the distance  $R(z)$  of its surface from the centerline. In the present work,  
 163 we always assume that deformation gradients are small, so that  $\partial_z R \ll 1$ . Then, the two

164 principal curvatures are simply given by

$$\kappa_\phi \approx -\frac{1}{R}, \quad \text{and} \quad \kappa_z \approx \partial_z^2 R, \quad (\text{B6})$$

165 which are used in the remainder of the Supplementary Material. In the upcoming sections,  
 166 we will discuss the physical processes that can dynamically modify these local geometric  
 167 properties of the organoid branch.

## 168 2. Active cell contractility induces anisotropic tension and Laplace pressure

169 As discussed in section B 1 “Choice of coordinate system”, we describe the organoid  
 170 branch as a thin tubular shell. At the surface of the organoid branch, contractile cells form  
 171 a thin confluent tissue. Furthermore, this surface defines an interface between the fluid  
 172 in the lumen of the organoid branch and the extracellular matrix outside of the organoid  
 173 branch [Supplementary Fig. 8]. Since the cells are the only active component of our system,  
 174 their activity determines the dynamics of the organoid branch. Specifically, nonequilibrium  
 175 cell contractility at the surface of the organoid branch confers an *active interfacial stress* in  
 176 the form of anisotropic surface tension, as we explain in the following.

177 **Link between cell orientation and tension anisotropy.** We consider cells as  
 178 anisotropic force dipoles [8, 9], where the anisotropy stems from the local orientation of  
 179 the cells and their cytoskeleton<sup>1</sup>. Before we characterize a population of many cells, we  
 180 first focus on describing a single cell. To that end, we consider the local reference frame  
 181 (tangent plane) that is spanned by the two (orthogonal but non-normalized) surface tangent  
 182 vectors ( $\mathbf{t}_z, \mathbf{t}_\phi$ ) and whose origin coincides with the position of the cell [Fig. 8b]. The cell is  
 183 oriented at an angle  $\theta$  relative to the axial surface tangent vector  $\mathbf{t}_z$ , so that we represent  
 184 its orientation with the vector

$$\hat{\mathbf{e}}_\theta = \cos(\theta) \frac{\mathbf{t}_\phi}{\|\mathbf{t}_\phi\|} + \sin(\theta) \frac{\mathbf{t}_z}{\|\mathbf{t}_z\|} \equiv \begin{bmatrix} \cos(\theta) \\ \sin(\theta) \end{bmatrix}. \quad (\text{B7})$$

185 Due to orientational order in its cytoskeleton, the cell can exert stronger (or weaker) tensile

<sup>1</sup> In section A 6 “Force inference”, we have represented the average tension tensor of a cell as a boundary integral of the forces that act on the cell boundary. Here, we consider the body forces that act as a result of intracellular actomyosin contractility. In the co-moving reference frame of a non-deforming cell, both descriptions are equivalent because internal stresses must exactly balance externally applied stresses.

186 forces along its axis  $\hat{\mathbf{e}}_\theta$  than along the perpendicular axis. Therefore, we split the tension  
 187 of a cell into two contributions: (i) an isotropic *base* tension  $\tau_0$  that preserves rotational  
 188 symmetry in our local reference frame and (ii) an additional anisotropic tension  $\Delta\tau$  along  
 189 the direction specified by the vector  $\hat{\mathbf{e}}_\theta$  that breaks rotational symmetry in our local reference  
 190 frame. Taken together, we model cell contractility with the following cell tension tensor<sup>2</sup>:

$$\boldsymbol{\tau}(\theta) = \tau_0 I_2 + \Delta\tau \hat{\mathbf{e}}_\theta \otimes \hat{\mathbf{e}}_\theta. \quad (\text{B8})$$

191 The diagonal elements of the cell tension tensor then correspond to the axial  $\tau_z$  and the  
 192 circumferential tension  $\tau_\phi$ , respectively:

$$\boldsymbol{\tau}(\theta) = \begin{bmatrix} \tau_0 + \Delta\tau \cos^2(\theta) & \Delta\tau \cos(\theta) \sin(\theta) \\ \Delta\tau \cos(\theta) \sin(\theta) & \tau_0 + \Delta\tau \sin^2(\theta) \end{bmatrix} \equiv \begin{bmatrix} \tau_z & \cdot \cdot \\ \cdot \cdot & \tau_\phi \end{bmatrix}. \quad (\text{B9})$$

193 Now consider a population of cells in which the cells differ in their orientations  $\hat{\mathbf{e}}_\theta$  and  
 194 exert an anisotropic tension  $\boldsymbol{\tau}(\theta)$ . We statistically represent the occurrence of different  
 195 cell orientations  $\theta$  by the probability density function  $P(\theta)$ , which we refer to as *angular*  
 196 *distribution of cell orientations*. The average tension tensor in the confluent tissue is then  
 197 given by the weighted average  $\bar{\boldsymbol{\tau}} = \int_{-\pi}^{\pi} d\theta P(\theta) \boldsymbol{\tau}(\theta)$ . Thus, the off-diagonal terms of the  
 198 average tension tensor in the confluent tissue vanish for a symmetric angular distribution  
 199 of cell orientations,  $P(\theta) = P(-\theta)$ . Furthermore, we note that the trace of the cell tension  
 200 tensor for each cell is independent of the cell's orientation,  $\text{tr}(\boldsymbol{\tau}) = \tau_z + \tau_\phi = 2\tau_0 + \Delta\tau$ .  
 201 Therefore, since the angular distribution of cell orientation is normalized,  $\int_{-\pi}^{\pi} d\theta P(\theta) = 1$ ,  
 202 the trace of the average tension tensor in the confluent tissue is constant,

$$\text{tr} \bar{\boldsymbol{\tau}} = \bar{\tau}_z + \bar{\tau}_\phi = 2\tau_0 + \Delta\tau. \quad (\text{B10})$$

203 In other words, the total tension in the confluent tissue,  $\bar{\tau}_z + \bar{\tau}_\phi$ , is independent of the angular  
 204 distribution of cell orientations. This explains our experimental finding that the sum of the  
 205 axial and the circumferential tension remains constant for all experiments.

206 If all cells are oriented in the same direction, e.g. along the centerline of the organoid  
 207 branch so that  $P(\theta) = \delta(\theta)$ , then the difference between the axial and the circumferential

<sup>2</sup> One can also rationalize this form by performing a boundary integral of the forces that act on the cell boundary, analogous to section A 6 “Force inference”.

208 tension is simply given by  $\bar{\tau}_z - \bar{\tau}_\phi = \Delta\tau$ . In contrast, if all cells are oriented randomly,  
 209  $P(\theta) = 1/(2\pi)$ , then axial and circumferential tension are equal  $\bar{\tau}_z = \bar{\tau}_\phi$ . Thus, if the cells are  
 210 initially aligned with the axial surface tangent vector  $\mathbf{t}_z$  (i.e. aligned with the centerline of the  
 211 tube) and subsequently *randomize* their orientation, then the circumferential tension in the  
 212 tissue will effectively increase at the expense of a decreasing axial tension. These theoretical  
 213 considerations imply that in our experiments the predominant process underlying tension  
 214 anisotropy is due to the reorientation of cells and not a change in their tensile properties  $\tau_0$   
 215 and  $\Delta\tau$ .

216 In the present section, we have investigated how the orientation of cells, treated as  
 217 anisotropic force dipoles, affects the average tension in a confluent tissue. From here on,  
 218 we will not describe the precise distribution of cell orientation. Instead, we simplify our de-  
 219 scription by considering only an axial tension  $\tau_z$  and an independent circumferential tension  
 220  $\tau_\phi$  on the surface of the tubular shell (i.e. the organoid branch); we also simplify notation  
 221 by omitting the overline indicating the population average.

222 **Tension anisotropy leads to generalized Laplace pressure.** Next, we discuss how  
 223 *anisotropic* surface tension couples to the organoid shape and how it is different from an  
 224 isotropic surface tension. We consider cells as active agents that perform work as they deform  
 225 the organoid branch (i.e. tubular shell). Instead of formally carrying out variational calculus  
 226 of surfaces, in this section we omit the corresponding surface integrals by considering the  
 227 dynamics of an (approximately homogeneous) infinitesimal surface patch with area  $A$ . In the  
 228 case of isotropic surface tension  $\tau_{iso}$ , the cells perform the work  $\delta W = -\tau_{iso} \delta A$  [10] as they  
 229 change the area of the surface patch on the tubular shell by  $\delta A$ . For a curved surface such as  
 230 the organoid branch, one can relate a change in surface area to a displacement of the surface  
 231 patch by a distance  $\delta u$  along its normal vector<sup>3,4</sup>,  $\delta A = -(\kappa_\phi + \kappa_z) \delta u A$  [7]. Thus, any

<sup>3</sup> This relation can be easily checked for spherical geometries (with radius  $R$ , azimuthal angle  $\phi$  and polar angle  $\vartheta$ ), where a surface patch has area  $A \equiv R^2 d\vartheta d\cos\phi$ . Then, radial movement of the surface patch by a distance  $\delta u$  changes its area by  $\delta A = \partial_R A \delta u = 2R d\vartheta d\cos\phi \delta u$ . Identifying the curvature of the sphere with  $\kappa_\phi = \kappa_\vartheta = -1/R$ , one then finds  $\delta A = -(\kappa_\phi + \kappa_\vartheta) \delta u A$ . One can perform an analogous calculation for straight tubular geometries.

<sup>4</sup> For general (i.e. undulating) tubular geometries, one has to determine how the surface area changes upon a deformation  $\delta u(z)$  via variational calculus. The surface area of the cylinder is given by the functional  $A[u] = 2\pi \int dz \sqrt{1 + (\partial_z u)^2} (R_0 + u)$ . The variation of the surface area of the cylinder is then also a functional:  $\delta A[u] = -2\pi \int dz (R_0 + u) (\kappa_\phi + \kappa_z) \delta u(z)$ , where the curvatures are given by Eq. (B5). For sufficiently thin patches, one can then approximate their surface area as  $2\pi \int dz (R_0 + u) \approx 2\pi dz (R_0 + u) \equiv A$ , to arrive at the expression in the main text.

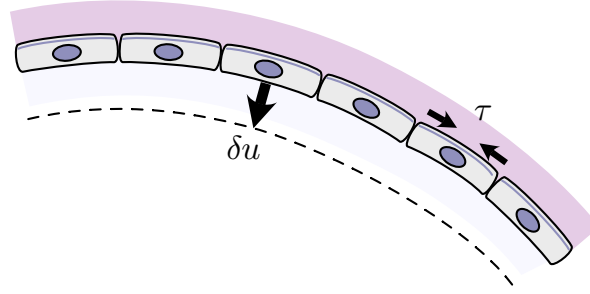

Supplementary Fig. 9. Illustration of a surface that moves by a distance  $\delta u$ , thereby decreasing its surface area from  $A$  (initial configuration, sketch) to  $A + \delta A$  (dashed line), where  $\delta A < 0$ . The surface consists of contractile cells, which exert a tension  $\tau$  that drives the dynamics.

232 surface patch that is curved towards its direction of motion,  $(\kappa_\phi + \kappa_z) \delta u > 0$ , will effectively  
 233 contract [Fig. 9]. This results in a cell-induced Laplace pressure  $\Delta p_{iso} = \frac{\delta W}{A \delta u} = (\kappa_\phi + \kappa_z) \tau_{iso}$ .  
 234 Note that this is a generalization of the expression for the Laplace pressure in a sphere,  
 236  $\Delta p_{iso} \sim 2\tau_{iso}/R$ , to generic surfaces.

237 Unlike isotropic tension, *anisotropic* tension breaks rotational symmetry, so that one  
 238 must individually consider the (relative) length changes that occur in different directions as  
 239 the cells deform the organoid branch. Here, it helps to envision (anisotropic) surface tension  
 240 as a meshwork of ropes, which are aligned along the axis and along the circumference of  
 241 the tubular shell, respectively. Then, one may associate axial tension with the work that is  
 242 required for increasing the (relative) length of the tubular shell, and circumferential tension  
 243 with the work that is required for increasing the (relative) circumference of the tubular shell.  
 244 In summary, one then has:

$$\delta W = - \left( \tau_z \frac{\delta l_z}{l_z} + \tau_\phi \frac{\delta l_\phi}{l_\phi} \right) A, \quad (\text{B11})$$

245 where  $l_z$  and  $l_\phi$  refer to the arc lengths on the surface and  $A = l_z l_\phi$  is the area of the  
 246 corresponding surface patch. Upon a displacement of the organoid surface by a distance  $\delta u$   
 247 along its normal vector, the circumferential arc length  $l_\phi$  and the axial arc length  $l_z$  change



248 as follows<sup>5,6</sup>:

$$\begin{aligned}\delta l_\phi &= -\kappa_\phi \delta u \ell_\phi \\ \delta l_z &= -\kappa_z \delta u \ell_z.\end{aligned}\tag{B12}$$

249 With these considerations, the (generalized) Laplace pressure on the tubular shell,  $\frac{\delta W}{A\delta u}$ , is  
250 given by:

$$\Delta p_\tau = \tau_\phi \kappa_\phi + \tau_z \kappa_z.\tag{B13}$$

251 By explicitly inserting the expressions for the axial and the circumferential curvatures,  
252 Eq. (B6), we obtain:

$$\Delta p_\tau = -\frac{\tau_\phi}{R} + \tau_z \partial_z^2 R.\tag{B14}$$

253 The generalized Laplace pressure, Eq. (B14), must be balanced by stresses in the fluid  
254 (specifically, viscous stresses and hydrostatic pressure) as well as by elastic stresses in the  
255 extracellular matrix [discussed in sections A 3 “Collagen “cage”” and B 4 “Bulk extracellular  
256 matrix elasticity does not significantly affect tube stability”].

### 257 3. Collagen cage envelops organoids and confers mechanical stability

258 In this section, we discuss the elastic properties of the extracellular matrix, which puts  
259 constraints on the deformations of the thin tubular shell (i.e. the organoid branch). We base  
260 our model on the experimental determination of the density and thickness of the collagen  
261 cage that surrounds branches and alveoli, as discussed above (section A 3 “Collagen “cage””).  
262 This is built by the contractile activity of the cells in the organoid branches, which gives rise  
263 to complex mechanical properties. Furthermore, its mechanical properties currently cannot  
264 be separated from the mechanical properties of the surrounding collagen matrix and the  
265 mechanical properties of the cells. As a consequence, its elastic modulus is unknown and  
266 not readily accessible to experiments. In this section, we estimate the elastic modulus of the  
267 collagen cage.

268 **Estimate for the rigidity of the collagen cage.** From fluorescence intensity mea-

<sup>5</sup> This relation can be illustrated as follows. Any curved line segment can be understood as a circle segment with angle  $d\phi$  and radius  $R$ . The arc length of this line segment is then given by  $\ell_\phi = R d\phi$ . Upon radial displacement by a distance  $\delta u$ , the arc length changes by  $\delta \ell_\phi = \partial_R \ell_\phi \delta u = d\phi \delta u$ . Identifying the curvature as  $\kappa_\phi \equiv -1/R$ , one then finds  $\delta \ell_\phi = -\kappa_\phi \delta u \ell_\phi$ .

<sup>6</sup> Note that from these relations one also finds  $\delta A = \ell_z \delta \ell_\phi + \ell_\phi \delta \ell_z = -(\kappa_\phi + \kappa_z) \delta u A$ , where  $A \equiv \ell_\phi \ell_z$ .

269 surements, we know that the collagen cage has a roughly 5-fold higher density than the  
 270 bulk collagen [1]. We now assume that the cage is structurally similar to bulk collagen, but  
 271 concentrated by a factor of 5. In general, the elastic modulus of collagen increases with  
 272 the concentration roughly in a power-law manner with an exponent in the range of 2.2–  
 273 2.6 [11, 12]. At our standard concentration of  $\rho_{\text{bulk}} = 1.3 \text{ mg ml}^{-1}$ , we measured the shear  
 274 modulus to be  $\mu \simeq 7 \text{ Pa}$  (data not shown; see [12]). The corresponding elastic modulus  
 275 can be calculated from the shear modulus by using [5]  $E = 2(1 + \nu)\mu$ , where the Poisson  
 276 ratio can be approximated as  $\nu = 0.5$  [13]. Taking a concentration-dependence exponent  
 277 of 2.2, we thus obtain a lower estimate of  $E_{\text{cage}} = 0.72 \text{ kPa}$  for the elastic modulus of the  
 278 collagen cage. Instead taking a concentration-dependence exponent of 2.6, we obtain an  
 279 upper estimate of  $E_{\text{cage}} = 1.38 \text{ kPa}$  for the elastic modulus of the collagen cage.

280 **Passive stretching of the collagen cage induces elastic stresses.** As discussed  
 281 in the previous paragraphs, organoid branches and alveoli are surrounded by a thin, dense  
 282 “collagen cage”, which we model as a thin elastic shell. In the following, we first discuss how  
 283 much energy is stored in elastic deformations of the collagen cage, which includes bending  
 284 and stretching [14]. Then, we determine the corresponding elastic boundary stresses that act  
 285 on the surface of a deformed tubular shell. Since we account for the mechanical properties  
 286 of cells by treating them as contractile force dipoles, cf. section B 2 “Active cell contractility  
 287 induces anisotropic tension and Laplace pressure”, we assume in the following that the elastic  
 288 response of the tubular shell is dominated by the elastic properties of the collagen cage and  
 289 not the cell sheet<sup>7</sup>.

290 We begin by considering stretching (or compression) of the collagen cage. To parameterize  
 291 the corresponding deformation field  $\mathbf{u}(z)$ , we use a cylindrical coordinate system that is  
 292 spanned by the normalized basis vectors [cf. section B 4 “Bulk extracellular matrix elasticity  
 293 does not significantly affect tube stability”]:

$$\hat{\mathbf{b}}_r = \begin{bmatrix} \cos \phi \\ \sin \phi \\ 0 \end{bmatrix}, \quad \hat{\mathbf{b}}_z = \begin{bmatrix} 0 \\ 0 \\ 1 \end{bmatrix}, \quad \text{and} \quad \hat{\mathbf{b}}_\phi = \begin{bmatrix} \sin \phi \\ \cos \phi \\ 0 \end{bmatrix}. \quad (\text{B15})$$

294 As we assume that the deformation gradients of the surface are small,  $\partial_z R \ll 1$ , the radial

<sup>7</sup> A more detailed approach would have to differentiate between the mechanical in-plane deformation of the collagen cage and the mechanical in-plane deformation of the cell sheet, because motile cells can move relative to the substrate that they adhere to.

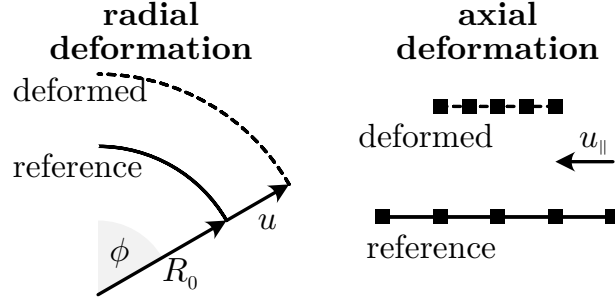

Supplementary Fig. 10. Illustration of radial deformations (left) and axial deformations (right). Any elastic body that is stretched or compressed exhibits elastic stresses that counteract these deformations.

295 basis vector coincides with the *unit* surface normal,  $\hat{\mathbf{b}}_r \approx \hat{\mathbf{n}}$ , and the axial basis vector  
 296 coincides with the (in that case normalized) surface tangent vector,  $\hat{\mathbf{b}}_z \approx \hat{\mathbf{t}}_z$ , cf. section B 1  
 297 “Choice of coordinate system”. We consider  $u \equiv u(z)$  as the radial (or *normal*) component  
 298 of the surface deformation field, which accounts for radial displacements of the surface. Such  
 299 radial deformations change the radius of the tubular shell from  $R_0$  in its cylindrical reference  
 300 configuration to  $R = R_0 + u$  in its deformed configuration. In addition, we also consider the  
 301 axial (or *tangential*) component of the surface deformation field,  $u_{\parallel} \equiv u_{\parallel}(z)$ , which however  
 302 has no effect on the shape of the tubular shell. To summarize, in our cylindrical geometry  
 303 the surface deformation field is given by  $\mathbf{u} = u \hat{\mathbf{b}}_r + u_{\parallel} \hat{\mathbf{b}}_z$

304 In the present work, we analyze the linear stability of the tubular shell and therefore  
 305 consider only infinitesimal deformations of the collagen cage from its cylindrical reference  
 306 configuration<sup>8</sup>. The corresponding linearized surface strain tensor is given by [5]:

$$\epsilon_{lin} = \frac{1}{2} [\nabla \otimes \mathbf{u} + (\nabla \otimes \mathbf{u})^T] = \sum_{i,j \in \{\phi,z\}} \epsilon_{ij} \hat{\mathbf{b}}_i \otimes \hat{\mathbf{b}}_j, \quad (\text{B16})$$

308 where the circumferential component  $\epsilon_{\phi\phi}$  and the axial component  $\epsilon_{zz}$  of the surface strain  
 309 tensor are given by [Fig. 10]:

$$\epsilon_{\phi\phi} \approx \frac{u}{R_0}, \quad \text{and} \quad \epsilon_{zz} \approx \partial_z u_{\parallel}. \quad (\text{B17})$$

310 Circumferential strain  $\epsilon_{\phi\phi}$  corresponds to a change of the circumferential arc length  $\ell_{\phi}$  due

<sup>8</sup> For a nonlinear analysis, one would have to calculate the nonlinear (Green) strain tensor,  $\epsilon_g = \epsilon_{lin} + \frac{1}{2} (\nabla \otimes \mathbf{u})^T \cdot (\nabla \otimes \mathbf{u})$ , where  $\epsilon_{lin}$  refers to the linear part of the strain tensor (B16). Such an analysis was carried out by Hannezo et al. [15].

311 to an out-of-plane displacement  $u$ , cf. Eq. (B12) and Fig. 9. Axial strain corresponds to  
 312 a compression or dilatation due to in-plane deformations. Neglecting in-plane shear strain  
 313  $\epsilon_{z\phi}$ , stretching of the tubular shell is associated with the following free energy density per  
 314 surface area [14]:

$$f_s = \frac{E_{cage} h}{2(1-\nu^2)} \left[ \epsilon_{\phi\phi}^2 + \epsilon_{zz}^2 + 2\nu\epsilon_{\phi\phi}\epsilon_{zz} \right], \quad (\text{B18})$$

315 where  $\nu \approx 0.5$  refers to the Poisson ratio of the collagen cage. The total energy that is stored  
 316 in stretching of the collagen cage is given by  $F_s[u, u_{||}] = \int dS_0 f_s$ , and is thus a functional  
 317 of the surface deformation field  $(u, u_{||})$ . Here,  $\int dS_0$  refers to a surface integral over the  
 318 reference configuration of the collagen cage. In the cylindrical reference configuration, the  
 319 (positive definite) stretching energy  $F_s$  vanishes and is therefore minimal. Consequently, any  
 320 deformation of the collagen cage is accompanied by a finite energy cost so that a further  
 321 deflection  $(u, u_{||}) \rightarrow (u + \delta u, u_{||} + \delta u_{||})$  costs an energy  $\delta F_s = F_s[u + \delta u, u_{||} + \delta u_{||}] - F_s[u, u_{||}]$ .  
 322 When external stresses are relieved, the collagen cage will gradually move back from the  
 323 deformed configuration to its reference configuration by releasing the stored elastic stretching  
 324 energy in the form of work. Thus, stretching of the collagen cage induces elastic stresses that  
 325 drive movement towards the mechanical reference configuration. We distinguish between two  
 326 possible (and independent) directions of movement, axial/tangential and radial/normal,  
 327 which couple to the respective stress fields. Tangential movement by some infinitesimal  
 328 distance  $\delta u_{||}$  is driven by a *shear stress* along the interface:

$$\begin{aligned} \sigma_{cage}^{rz} &= -\frac{\delta F_s}{\delta u_{||}} = -\frac{E_{cage} h}{2(1-\nu^2)} \frac{\delta}{\delta u_{||}} \int dS_0 \left[ \left( \frac{u}{R_0} \right)^2 + \left( \partial_z u_{||} \right)^2 + 2\nu \left( \frac{u}{R_0} \right) \left( \partial_z u_{||} \right) \right] \\ &= \partial_z \left[ \frac{E_{cage} h}{1-\nu^2} \left( \epsilon_{zz} + \nu\epsilon_{\phi\phi} \right) \right]. \end{aligned} \quad (\text{B19})$$

329 Here, the term in square brackets corresponds to the axial component of the elastic sur-  
 330 face tension in response to deformations of the thin shell. Specifically, by identifying the  
 331 axial tension with  $\tau_{el,zz} := \partial f_s / \partial \epsilon_{zz}$ , cf. Eq. (B18), one finds that  $\sigma_{cage}^{rz} = \partial_z \tau_{el,zz}$ . Thus,  
 332 Eq. (B19) illustrates that tangential shear stresses correspond to surface tension gradients,  
 333 where regions with larger tension effectively pull on regions with lower tension.

334 These elastic shear stresses in the organoid branch are balanced by viscous stresses of the  
 335 fluid that fills the organoid branch and by elastic stresses of the extracellular matrix. Since  
 336 the cells are motile, they can move relative to the collagen cage. By extension of argument,

337 the collagen cage can *slip* against the cell sheet and the fluid in the lumen of the organoid  
 338 branch, so that the tangential shear stresses induced by the collagen cage relax quickly  
 339 compared to the normal stresses. Assuming such a timescale separation, the tangential  
 340 shear stresses in the collagen cage will vanish on the timescales relevant for perpendicular  
 341 motion of the interface<sup>9</sup>. Then, one finds from Eq. (B19) that  $\epsilon_{zz} = C - \nu\epsilon_{\phi\phi}$ , where  $C$   
 342 is some constant. With this adiabatic approximation, the free energy density (per surface  
 343 area) that is stored in stretching deformations of the tubular shell simplifies to:

$$f_s^* = \frac{E_{cage} h}{2} \left[ \epsilon_{\phi\phi}^2 + \frac{C^2}{(1 - \nu^2)} \right]. \quad (\text{B20})$$

344 Since, by definition, both the free energy that is stored in deformations and the corresponding  
 345 tensions vanish in the reference configuration, the constant  $C = 0$  must also vanish. Just as  
 346 tangential movement is driven by a *shear stress* along the interface, perpendicular motion  
 347 of the surface by some infinitesimal distance  $\delta u$  is driven by a *normal stress* that acts on  
 348 the surface:

$$\Delta p_s = -\frac{\delta F_s}{\delta u} \approx \partial_u f_s^* = -\frac{1}{R_0} \left[ E_{cage} h \frac{u}{R_0} \right]. \quad (\text{B21})$$

349 The deformed radius of the tubular shell is given by  $R = R_0 + u$  and the reference radius  
 350 is given by  $R_0$ . The term in square brackets corresponds to the circumferential component  
 351 of the elastic surface tension in response to deformations of the thin shell. Thus, Eq. (B21)  
 352 can be understood as a Laplace pressure that is associated with tension due to elastic  
 353 deformations.

354 **Passive bending of the collagen cage is counteracted by elastic stresses.** Next,  
 355 we discuss the Helfrich free energy density per surface area that is stored in bending defor-  
 356 mations of the collagen cage [16]:

$$f_b = \frac{1}{2} k_b \left[ (\kappa_\phi - c_\phi)^2 + (\kappa_z - c_z)^2 \right], \quad (\text{B22})$$

357 where  $c_\phi$  is the circumferential spontaneous curvature and  $c_z$  is the axial spontaneous cur-  
 358 vature of the tubular shell. In the following, we assume that the tubular shape corresponds

<sup>9</sup> For a more general treatment, we would have to explicitly model the relaxation dynamics of the tangential shear stresses by considering the viscous properties of the collagen cage and/or the surrounding elastic medium.

to the mechanical reference configuration of the organoid branch, which therefore minimizes the bending energy. Thus, we set the axial spontaneous curvature to  $c_z = 0$  and the circumferential spontaneous curvature to  $c_\phi = -1/R_0$ . This is a plausible ansatz since the collagen cage grows due to the contractility of the pre-existing organoid branch and persists even after washing out the epithelial cells [1]. Nevertheless, one would have to modify this assumption if the initial tubular shape corresponds to a pre-strained configuration, or if the shell-like organoid branch itself also significantly contributes to the bending energy<sup>10</sup>. For small deformations  $u$ , the two principal curvatures of the tubular shell are in good approximation given by  $\kappa_z = \partial_z^2 u$  and  $\kappa_\phi = -1/R$ , along the axis  $z$  and the circumference  $\phi$  respectively, cf. Eq. (B6). The free energy density (per surface area) that is stored in deformations of the collagen cage is then given by:

$$f_b = \frac{1}{2}k_b \left[ \left( \frac{1}{R} - \frac{1}{R_0} \right)^2 + (\partial_z^2 u)^2 \right] \approx \frac{1}{2}k_b \left[ \frac{u^2}{R_0^4} + (\partial_z^2 u)^2 \right], \quad (\text{B23})$$

for sufficiently small deformations of the tubular shell,  $u \ll R_0$ . The total bending energy of the collagen cage is given by  $F_b[u] = \int dS_0 f_b$ , and is a functional of the radial component of the surface deformation field,  $u$ . Here, as above,  $\int dS_0$  refers to a surface integral over the reference configuration of the collagen cage. In the cylindrical reference configuration, the (positive definite) bending energy  $F_b$  vanishes and is therefore minimal. Consequently, any deformation of the collagen cage is accompanied by a finite energy cost so that a further deflection  $u \rightarrow u + \delta u$  costs an energy  $\delta F_b = F_b[u + \delta u] - F_b[u]$ . When external stresses are relieved, the collagen cage will gradually move back from the deformed configuration to its reference configuration by releasing the stored elastic bending energy in the form of work. Thus, bending deformations of the collagen cage induce elastic stresses that drive movement towards the mechanical reference configuration. In principle, as above, we distinguish between two possible (and independent) directions of movement, axial/tangential and radial/normal, which couple to the respective stress fields. However, since the free energy that is stored in bending deformations does not depend on the axial component of the deformation field,  $\delta F_b / \delta u_{\parallel} = 0$ , the tangential shear stresses vanish. Note that there is a deeper reason as to why there are no tangential shear stresses in response to bending. For tangen-

<sup>10</sup> Cell contractility can effectively lead to a spontaneous curvature of thin cell sheets due to an asymmetric positioning of the cells' actomyosin cytoskeleton relative to the middle surface of the cell sheet [17]. If the spontaneous curvature is induced by cell contractility, then it can also be influenced by the local orientation of cells.

386 tial deformations, the material points of the thin shell only move along the surface, thus  
 387 leaving its shape unchanged. Since the bending energy (B23) only depends on the shape of  
 388 the thin shell, it follows that tangential deformations cannot induce bending stresses. This  
 389 only leaves perpendicular motion of the surface by some infinitesimal distance  $\delta u$ , which is  
 390 driven by a *normal stress* that acts on the surface:

$$\Delta p_b = -\frac{\delta F_b}{\delta u} = -k_b \left[ \frac{u}{R_0^4} + \partial_z^4 u \right], \quad (\text{B24})$$

391 where the deformed radius of the tubular shell is given by  $R = R_0 + u$  and the reference  
 392 radius is given by  $R_0$ . Summing up the stresses that arise in response to stretching and  
 393 bending of the collagen cage, Eq. (B21) and Eq. (B24),

$$\Delta p_{cage} = -E_{cage} h \frac{u}{R_0^2} - k_b \left[ \frac{u}{R_0^4} + \partial_z^4 u \right], \quad (\text{B25})$$

394 yields the *normal* component of the total boundary stress due to elastic deformations. As  
 395 our notation suggests, one can interpret the *normal* component of the boundary stresses as  
 396 a pressure jump between the lumen of the organoid branch and the surrounding medium.  
 397 This corresponds to an effective pushing stress (if positive) or pulling stress (if negative) on  
 398 the interface from outside of the organoid branch.

399 **Linear stability analysis.** A cylindrical configuration of the thin tubular shell (i.e.  
 400 the organoid branch) is stable whenever the combined effect of all elastic stresses and the  
 401 active cellular tension *counteracts* any small shape perturbation. In this section, we use  
 402 this argument to find conditions for which a cylindrical shape becomes linearly unstable.  
 403 To that end, as we have done in the previous sections, we consider rotationally symmetric  
 404 deformations of the tubular shell,  $R = R_0 + u$ , that are small compared to the equilibrium  
 405 radius of the tube,  $u \ll R_0$ . At the organoid branch interface, there is a local balance  
 406 between fluid stress, generalized Laplace pressure [Eq. (B14)] and the elastic stress induced  
 407 by deformations of the collagen cage [Eq. (B25)]:

$$\begin{aligned} \sigma_{visc}^{rr} &= p_0 - \frac{\tau_\phi}{R} + \tau_z \partial_z^2 u - E_{cage} h \frac{u}{R_0^2} - k_b \left[ \frac{u}{R_0^4} + \partial_z^4 u \right] \\ &\approx p_0 - \frac{\tau_\phi}{R_0} + \left[ \frac{\tau_\phi}{R_0^2} - \frac{E_{cage} h}{R_0^2} - \frac{k_b}{R_0^4} + \tau_z \partial_z^2 - k_b \partial_z^4 \right] u. \end{aligned} \quad (\text{B26})$$

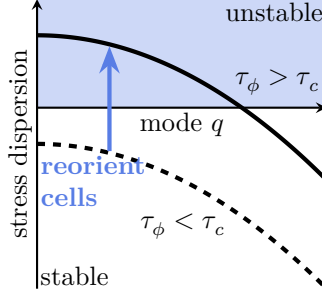

Supplementary Fig. 11. Stress dispersion relation as a function of the mode  $q$ . A reorientation of cells can increase the circumferential tension at the expense of the axial tension, thus shifting the stress dispersion relation upwards (blue arrow) and inducing a band of unstable modes.

408 The left-hand side of the stress-balance equation, Eq. (B26), corresponds to dynamic viscous  
 409 stresses  $\sigma_{visc}^{rr}$  that vanish in steady state. Hence, only the right-hand side of the stress-balance  
 410 equation (B26), where we have collected the hydrostatic pressure, the generalized Laplace  
 411 pressure, and elastic stresses, determines the stability of the tubular shell. The stress-  
 412 balance equation, Eq. (B26), must hold for any deformation of the tubular shell, including  
 413 the reference configuration itself ( $u = 0$ ). Therefore, the hydrostatic pressure is given by  
 414  $p_0 = \tau_\phi/R_0$ . Finally, we express the small deformations  $u$  in terms of Fourier components,  
 415  $u = \sum_q u_q \cos(qz)$ , and thus obtain the following stress dispersion relation near mechanical  
 416 equilibrium [Fig. 11]:

$$\Delta p_q = \left[ \frac{\tau_\phi}{R_0^2} - \frac{E_{cage} h}{R_0^2} - \frac{k_b}{R_0^4} - \tau_z q^2 - k_b q^4 \right] u_q. \quad (\text{B27})$$

417 Since the last two terms of equation (B27) are stabilizing (positive axial tension  $\tau_z$  and  
 418 positive bending rigidity  $k_b$ ), a band of unstable modes can only emerge if<sup>11</sup>:

$$\tau_\phi > \tau_c = E_{cage} h + \frac{k_b}{R_0^2}. \quad (\text{B28})$$

420 These results indicate a long-wavelength instability according to the Cross/Hohenberg clas-  
 421 sification scheme [19]; specifically, the mechanical driving stress is largest for the  $q = 0$   
 422 mode. However, note that here this will not be the fastest-growing mode, as homogeneous  
 423 modes  $q = 0$  are prohibited by the incompressibility of the fluid in the lumen of the organoid  
 424 branch.

<sup>11</sup> The classical result for the pearling instability has an additional factor of 2/3 in the second term, because it considers a material with zero spontaneous curvature along both principal directions [18]. Then, the bending energy acts as an additional destabilizing term.



425 In general, increasing the circumferential tension will increase the mechanical driving  
 426 stress [cf. right-hand side of the stress-balance equation (B26)], and will therefore speed  
 427 up the pearling instability. Furthermore, we note that the pearling instability occurs when  
 428 the circumferential tension and the corresponding Laplace pressure are sufficiently strong  
 429 to overcome the stabilizing effects conferred by the elastic properties of the collagen cage  
 430 [Eq. (B27)]. As the alveolus grows, the Laplace pressure will then decrease, while the  
 431 hydrostatic pressure will remain approximately constant (if the alveolus is still connected  
 432 to an organoid branch). Furthermore, the stress due to elastic bending of the collagen cage  
 433 is much smaller than the stress due to elastic stretching, given that the former scales with  
 434 the thickness of the collagen cage  $h$  and the latter scales with  $h^3$ . Therefore, for a spherical  
 435 alveolus whose radius grows from  $R_0$  to  $R$  at the tip of an organoid branch, we can make  
 436 the following approximation:

$$\sigma_{visc}^{rr} = \Delta p = \frac{\tau_\phi}{R_0} - \frac{\tau_\phi}{R} - E_{cage} h \frac{R - R_0}{R_0^2}. \quad (\text{B29})$$

437 The final equilibrium radius of the alveolus is then determined by the steady-state condition  
 438  $\sigma_{visc}^{rr} = 0$  and is therefore given by

$$\frac{R}{R_0} = \frac{\tau_\phi}{E_{cage} h}. \quad (\text{B30})$$

439 We conclude that the above theory predicts that an increase in surface tension will lead to  
 440 larger alveoli that also form faster. These results hold on sufficiently short timescales, where  
 441 the deformation of the extracellular matrix is elastic and fully reversible. On long timescales,  
 442 if the stresses in the extracellular matrix are above the plastic yield threshold, then the  
 443 reference radius  $R_0$  will effectively increase due to plastic deformation of the extracellular  
 444 matrix thus leading to a robust and continued growth of spherical alveoli as we have discussed  
 445 in the main text.

446 **Estimating the critical circumferential tension.** We next estimate the magnitude  
 447 of the critical tension. For a homogeneously elastic sheet with elastic modulus  $E_{cage}$ , Poisson  
 448 ratio  $\nu$  and thickness  $h$ , the bending modulus is given by [5]  $k_b = E_{cage} h^3 / [12(1 - \nu^2)]$ . In  
 449 section A3 “Collagen ‘cage’”, confocal microscopy data showed that the collagen cage has  
 450 a typical thickness of  $h \simeq 5 \mu\text{m}$ . Furthermore, we have estimated in section A3 “Collagen

451 “cage” that the elastic modulus of the collagen cage should lie in the range between  $E_{cage} =$   
 452  $0.72 \text{ kPa}$  and  $E_{cage} = 1.38 \text{ kPa}$ . Furthermore, analogously to section A 3 “Collagen “cage””,  
 453 we assume that the collagen cage (which has a collagen concentration of roughly  $6.5 \text{ mg ml}^{-1}$ )  
 454 is incompressible, such that  $\nu = 1/2$  [20]. For a branch radius of  $R_0 = 30 \mu\text{m}$ , we find that  
 455 the critical circumferential tension  $\tau_c$  of the organoid branch [Eq. (B28)] lies in the range  
 456 between  $\tau_c = 3.6 \text{ mN m}^{-1}$  and  $\tau_c = 6.9 \text{ mN m}^{-1}$ . Values for the cortical tension of single  
 457 contractile cells have been measured via micropipette aspiration to be about  $0.4 \text{ mN m}^{-1}$   
 458 for L929 fibroblasts [21] and have similar values for chick fibroblasts [22],  $4.1 \text{ mN m}^{-1}$  for  
 459 *Dictyostelium discoideum* [23], and via traction force microscopy to reach up to  $5 \text{ mN m}^{-1}$  for  
 460 human microvascular endothelial cells [24] (HMEC-1). Furthermore, micropipette aspiration  
 461 of spheroids consisting of MCF-10A (human mammary epithelial) cells has yielded a value  
 462 of  $10 \text{ mN m}^{-1}$  [25] for the corresponding surface tension.

463 We conclude that the active tension induced by cellular contractility is strong enough  
 464 to trigger a pearling instability against the mechanical resistance of the collagen cage. In  
 465 addition, the active tension induced by cellular contractility is sufficiently small so that  
 466 an axial alignment of cells [cf. section B 2 “Active cell contractility induces anisotropic  
 467 tension and Laplace pressure”] could keep the circumferential component of the tension  
 468 tensor below the critical value, Eq. (B28). Finally, our cell tracking data show that collective  
 469 rotations of cells around the circumference of the organoid branch typically begin at the tips  
 470 of the organoid branches [cf. Fig. 3 in the main text]. This observation is rooted in the  
 471 fact that at the tips of the organoid branches, cells have to repolarize and either migrate  
 472 back or begin collectively migrating around the circumference (i.e. rotations); the latter  
 473 corresponds to the least frustrated state where cells can keep migrating with the least number  
 474 of changes in direction. Therefore, cell reorientation and an increase in circumferential  
 475 tension at the expense of axial tension also typically begin at the tips of the organoid  
 476 branches. Furthermore, note that Buchmann and Meixner et al. [1] have shown that the  
 477 collagen cage is thinner at the organoid branch tips and approaches a thickness of up to  
 478  $h = 10 \mu\text{m}$  towards the organoid body. In that case, the critical tension would increase  
 479 by a factor of at least 2 (relative to our estimated value, assuming that the collagen cage  
 480 has the same elastic modulus near the organoid body) towards the organoid body. These  
 481 two observations (preferred cell reorientation and thinner collagen cage) rationalize why the  
 482 pearling instability preferably occurs at the organoid branch tips.

#### 4. Bulk extracellular matrix elasticity does not significantly affect tube stability

So far, we have assumed that a tubular configuration of the shell-like organoid branch is stabilized by a rigid collagen cage. In addition, the organoid branch is also surrounded by an elastic extracellular matrix. Thus, one may wonder whether a collagen cage is required, or if a homogeneous extracellular matrix itself would be sufficient to stabilize tubular shapes. In the following, we argue that a homogeneously elastic extracellular matrix is too soft to stabilize the cylindrical organoid branch against its own contractility.

To that end, we use linear elasticity theory. The extracellular collagen matrix is a three-dimensional body and thus requires a treatment in terms of three-dimensional bulk coordinates

$$\mathbf{r}(r, z, \phi) = \begin{bmatrix} r \cos \phi \\ r \sin \phi \\ z \end{bmatrix}, \quad (\text{B31})$$

which match the surface coordinates at the interface of our tubular geometry [cf. section B 1 “Choice of coordinate system”]. The three (orthogonal but non-normalized) basis vectors that span the three-dimensional of our tubular geometry are then given by

$$\mathbf{b}_r = \begin{bmatrix} \cos \phi \\ \sin \phi \\ 0 \end{bmatrix}, \quad \mathbf{b}_z = \begin{bmatrix} 0 \\ 0 \\ 1 \end{bmatrix}, \quad \text{and} \quad \mathbf{b}_\phi = \begin{bmatrix} -r \sin \phi \\ r \cos \phi \\ 0 \end{bmatrix}. \quad (\text{B32})$$

In the present section, we use contravariant notation to express vectors,  $\mathbf{v} = v^i \mathbf{b}_i$ , and tensors,  $\boldsymbol{\sigma} = \sigma^{ij} \mathbf{b}_i \otimes \mathbf{b}_j$ . Contravariant notation indicates that the components of any vector field,  $v^i$ , transform inversely in response to any basis transformation, so that the vector field  $\mathbf{v}$  itself remains invariant. As before, we assume a rotational symmetry around the  $z$ -axis.

We associate the mechanical reference configuration of the organoid branch and of the extracellular matrix with the initial shape of the tubular shell. Then, we consider infinitesimal deviations from this reference configuration, which are parameterized by the deformation

504 field  $\mathbf{u}$ . The corresponding linearized strain tensor is given by [5]:

$$\boldsymbol{\epsilon}_{lin} = \frac{1}{2} [\boldsymbol{\nabla} \otimes \mathbf{u} + (\boldsymbol{\nabla} \otimes \mathbf{u})^T] = \sum_{i,j \in \{r,\phi,z\}} \epsilon^{ij} \mathbf{b}_i \otimes \mathbf{b}_j. \quad (\text{B33})$$

505 In contrast to section A 3 “Collagen “cage””, as discussed above, we have here expressed the  
506 linearized strain tensor in contravariant notation. In our rotationally symmetric cylindrical  
507 coordinate system, the strain tensor is given by:

$$\boldsymbol{\epsilon}_{lin} \equiv \begin{bmatrix} \epsilon^{rr} & \epsilon^{rz} & \epsilon^{r\phi} \\ \epsilon^{zr} & \epsilon^{zz} & \epsilon^{z\phi} \\ \epsilon^{\phi r} & \epsilon^{\phi z} & \epsilon^{\phi\phi} \end{bmatrix} = \begin{bmatrix} \partial_r u^r & (\partial_z u^r + \partial_r u^z)/2 & \partial_r u^\phi/2 \\ (\partial_z u^r + \partial_r u^z)/2 & \partial_z u^z & \partial_z u^\phi/2 \\ \partial_r u^\phi/2 & \partial_z u^\phi/2 & u^r/r^3 \end{bmatrix}. \quad (\text{B34})$$

508 The trace of the strain tensor in our cylindrical coordinate system,

$$\begin{aligned} \text{tr}_g(\boldsymbol{\epsilon}_{lin}) &= \sum_{i \in \{r,\phi,z\}} \hat{\mathbf{b}}_i \cdot \boldsymbol{\epsilon}_{lin} \cdot \hat{\mathbf{b}}_i = \epsilon^{rr} + \epsilon^{zz} + r^2 \epsilon^{\phi\phi} \\ &= \partial_z u^z + \frac{1}{r} \partial_r (r u^r) = \boldsymbol{\nabla} \cdot \mathbf{u}, \end{aligned} \quad (\text{B35})$$

509 indicates volumetric changes (i.e. isotropic compression and dilatation) due to the deforma-  
510 tion field  $u$ . Splitting the strain tensor into a pure shear component and a pure volumetric  
511 part, the linear elastic stress tensor is given by [5]:

$$\begin{aligned} \boldsymbol{\sigma}_{el} &= 2\mu \left[ \boldsymbol{\epsilon}_{lin} - \frac{1}{3} \text{tr}_g(\boldsymbol{\epsilon}_{lin}) I_3 \right] + \frac{2\mu}{3} \frac{1+\nu}{1-2\nu} \text{tr}_g(\boldsymbol{\epsilon}_{lin}) I_3 \\ &= 2\mu \left[ \boldsymbol{\epsilon}_{lin} + \frac{\nu}{1-2\nu} \text{tr}_g(\boldsymbol{\epsilon}_{lin}) I_3 \right], \end{aligned} \quad (\text{B36})$$

512 where  $I_3$  refers to the identity matrix. A mechanical force balance in the bulk of the ex-  
513 tracellular matrix implies that the body force that acts on an infinitesimal volume element  
514 vanishes [26]:

$$\mathbf{f} = \boldsymbol{\nabla} \cdot \boldsymbol{\sigma}_{lin} = \begin{bmatrix} \frac{1}{r} \partial_r (r \sigma_{el}^{rr}) + \partial_z \sigma_{el}^{rz} - r \sigma_{el}^{\phi\phi} \\ \frac{1}{r} \partial_r (r \sigma_{el}^{rz}) + \partial_z \sigma_{el}^{zz} \\ \frac{1}{r} \partial_r (r \sigma_{el}^{r\phi}) + \frac{2}{r} \sigma_{el}^{r\phi} + \partial_z \sigma_{el}^{z\phi} \end{bmatrix} = 0. \quad (\text{B37})$$

The circumferential component of the body force vanishes in the absence of torques. Then, the remaining mechanical force balance equations in the bulk of the extracellular matrix are

given by:

$$\partial_z \left[ \frac{1}{1-2\nu} \frac{1}{r} \partial_r (r u^r) + 2 \frac{1-\nu}{1-2\nu} \partial_z u^z \right] + \frac{1}{r} \partial_r (r \partial_r u^z) = 0, \quad (\text{B38a})$$

$$\partial_r \left[ 2 \frac{1-\nu}{1-2\nu} \frac{1}{r} \partial_r (r u^r) + \frac{1}{1-2\nu} \partial_z u^z \right] + \partial_z^2 u^r = 0, \quad (\text{B38b})$$

515 where  $u^r$  and  $u^z$  refer to the radial and axial deformation field, in contravariant notation,  
 516 respectively. To solve these equations, we introduce the stress function  $\Phi$  via an implicit  
 517 definition:

$$u^r = -\partial_r \partial_z \Phi, \quad u^z = 2(1-\nu)\Delta\Phi - \partial_z^2 \Phi. \quad (\text{B39})$$

518 By inserting Eq. (B39) into Eqs. (B38a) and (B38b), one finds that the stress function  $\Phi$   
 519 must satisfy the biharmonic equation in cylindrical coordinates [26]:

$$\Delta^2 \Phi = 0. \quad (\text{B40})$$

520 We are interested in undulations of the tubular organoid branch, and therefore decompose  
 521 the deformation field of the extracellular matrix into Fourier modes:  $u^r = \sum_q u_q^r(r) \cos(qz)$   
 522 and  $u^z = \sum_q u_q^z(r) \sin(qz)$ . Thus, we may also express the stress function in terms of  
 523 Fourier modes:  $\Phi = \sum_q \Phi_q(r) \sin(qz)$ . The general real-valued solution to the biharmonic  
 524 equation (B40) is then given by:

$$\Phi_q(r) = a_1 \left[ Y_0(-iqr) + iI_0(qr) \right] + a_2 I_0(qr) + ia_3 r \left[ I_1(qr) + Y_1(-iqr) \right] + a_4 r I_1(qr), \quad (\text{B41})$$

525 where  $I_k(x)$  refers to the modified Bessel function of the first kind and  $Y_k(x)$  refers to the  
 526 Bessel function of the second kind, respectively. As we consider the extracellular matrix as  
 527 an elastic medium in the half-space  $r \geq R$ , we are only interested in real-valued solutions  
 528  $(u^r, u^z)$  that decay in the far field and approach zero as  $r \rightarrow \infty$ . This constraint fixes two  
 529 of the four coefficients in Eq. (B41),  $a_2 = 0$  and  $a_4 = 0$ , which correspond to solutions that  
 530 would vanish at  $r \rightarrow 0$  and diverge in the far field  $r \rightarrow \infty$ . The remaining two coefficients  $a_1$   
 531 and  $a_3$  can be determined by imposing boundary conditions on the deformation field. Here,  
 532 we choose a general radial deformation,  $u_q^r(R)$ , and impose no-slip conditions on the axial

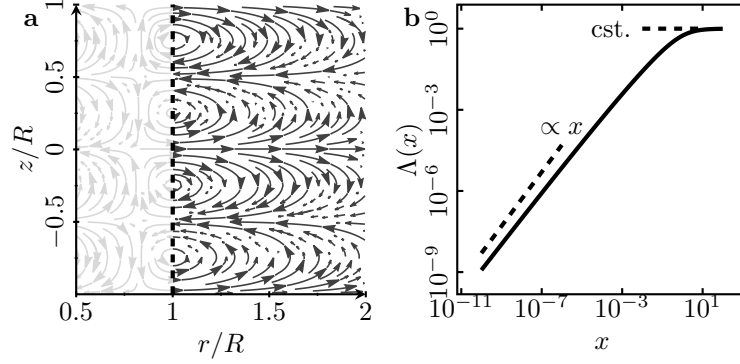

Supplementary Fig. 12. **a)** Exemplary deformation field around a tubular branch, for an incompressible extracellular matrix  $\nu = 1/2$  and a Fourier mode  $q = 2\pi/R$ . The gray region indicates the wall of the organoid branch. **b)** Illustration of the function  $\Lambda(x)$ , which saturates (dashed line) for large arguments and grows (approximately) linearly for small arguments. Thus, the normal component of the elastic stress grows quadratically for small arguments  $qR$  and linearly for large arguments  $qR$ . For simplicity, we have assumed an incompressible material,  $\nu = 1/2$ .

533 deformation,  $u_q^z(R) = 0$ . Then, the stress function is given by the following expression:

$$\Phi_q(r) = \frac{u_q^r(R)}{q^2} \frac{K_0(qr)}{K_1(qR)} \left[ 1 + q \Theta(qR) \left( RB(qR) - \frac{r}{B(qr)} \right) \right], \quad (\text{B42})$$

534 where we have defined

$$\Theta(x) := \frac{B(x)}{x - B(x)[4(1 - \nu) + xB(x)]}, \quad \text{and} \quad B(x) := \frac{K_0(x)}{K_1(x)}, \quad (\text{B43})$$

and where  $K_k(x)$  refers to the modified Bessel function of the second kind. Using Eq. (B39), we readily obtain the full (rotationally symmetric) deformation field of the extracellular matrix. Then, we calculate the radial component of the elastic stress tensor,  $\sigma_{el}^{rr}$ , where  $\mu$  refers to the shear modulus of the extracellular matrix [cf. Eq. (B36)]:

$$\sigma_{el}^{rr}(R) = -\frac{2\mu}{R} \sum_q \left( 1 + qR\Lambda(qR) \right) u_q^r(R) \cos(qz), \quad (\text{B44a})$$

$$\Lambda(x) := -2(1 - \nu)B(x)\Theta(x). \quad (\text{B44b})$$

535 The above function  $\Lambda(x)$  and the deformation field are depicted in Supplementary Fig. 12.  
 536 For the no-slip boundary conditions that we have chosen here, the normal stress grows  
 537 quadratically for small arguments  $qR \ll 1$  and linearly for large arguments  $qR \gg 1$ .

538 Replacing the thin bendable collagen cage with an extended homogeneous extracellu-  
 539 lar matrix, the mechanical driving stress [cf. right-hand side of the stress-balance equa-  
 540 tion (B26)] on the shell-like organoid branch is given by

$$\Delta p_q = \left[ \frac{\tau_\phi}{R_0^2} - \tau_z q^2 - \frac{2\mu}{R_0} \left( 1 + qR_0 \Lambda(qR_0) \right) \right] u_q. \quad (\text{B45})$$

541 The first term (Laplace pressure due to circumferential tension) in the square brackets is  
 542 destabilizing and does not depend on the wavelength. The second term (Laplace pressure  
 543 due to axial tension) in the square brackets stabilizes short wavelengths. The third term in  
 544 the square brackets (elastic stress) has a contribution that stabilizes long wavelengths ( $q = 0$ )  
 545 and a contribution that stabilizes short wavelengths ( $q > 0$ ). In particular, for the no-slip  
 546 boundary conditions that we have chosen here, the function  $\Lambda(x)$  grows monotonically as  
 547 its argument  $x$  increases, cf. Supplementary Fig. 12b, with  $x\Lambda(x) \propto x^2$  for small arguments.  
 548 We conclude that a pearling-like instability at low wavelengths (i.e. for  $q \rightarrow 0$ ) will only  
 549 occur if the Laplace pressure due to circumferential tension can overcome the stabilizing  
 550 effects conferred by the extracellular matrix:

$$\tau_\phi > 2\mu R_0 \quad (\text{B46})$$

551 For a shear modulus of  $\mu \approx 7 \text{ Pa}$  this yields a critical surface tension of  $0.4 \text{ mN m}^{-1}$ , which is  
 552 far below the reference tension of  $10 \text{ mN m}^{-1}$  for the surface tension of spheroids consisting of  
 553 MCF-10A (human mammary epithelial) cells [25]. Thus, we conclude that the homogeneous  
 554 extracellular matrix alone is unlikely to stabilize a tubular geometry in our experiments,  
 555 which further emphasizes the mechanical role of the collagen cage.

- 
- 556 [1] Buchmann, B. *et al.* Mechanical plasticity of the ECM directs invasive branching mor-  
 557 phogenesis in human mammary gland organoids. *To appear in Nat. Comm.* (2021).  
 558 <https://www.biorxiv.org/content/early/2019/11/29/860015.full.pdf>.
- 559 [2] Schliwa, M. Action of cytochalasin D on cytoskeletal networks. *Journal of Cell Biology* **92**,  
 560 79–91 (1982).
- 561 [3] Berg, S. *et al.* ilastik: interactive machine learning for (bio)image analysis. *Nature Methods*

- (2019).
- [4] Brodland, G. W. *et al.* CellFIT: A cellular force-inference toolkit using curvilinear cell boundaries. *PLOS ONE* **9**, 1–15 (2014).
- [5] Landau, L. *et al.* *Theory of Elasticity: Volume 7*. Course of theoretical physics (Elsevier Science, 1986).
- [6] Kong, W. *et al.* Experimental validation of force inference in epithelia from cell to tissue scale. *Scientific Reports* **9**, 14647 (2019).
- [7] Grinfeld, P. *Introduction to Tensor Analysis and the Calculus of Moving Surfaces* (Springer, 2013).
- [8] Bischofs, I. B. & Schwarz, U. S. Cell organization in soft media due to active mechanosensing. *Proceedings of the National Academy of Sciences* **100**, 9274–9279 (2003). URL <https://www.pnas.org/content/100/16/9274>. <https://www.pnas.org/content/100/16/9274.full.pdf>.
- [9] Bischofs, I. B., Safran, S. A. & Schwarz, U. S. Elastic interactions of active cells with soft materials. *Phys. Rev. E* **69**, 021911 (2004). URL <https://link.aps.org/doi/10.1103/PhysRevE.69.021911>.
- [10] Safran, S. *Statistical Thermodynamics Of Surfaces, Interfaces, And Membranes* (CRC Press, Boca Raton, 2003).
- [11] Raub, C., Putnam, A., Tromberg, B. & George, S. Predicting bulk mechanical properties of cellularized collagen gels using multiphoton microscopy. *Acta Biomaterialia* **6**, 4657 – 4665 (2010).
- [12] Jansen, K. A. *et al.* The role of network architecture in collagen mechanics. *Biophysical Journal* **114**, 2665–2678 (2018).
- [13] Liu, B., Zhang, L. & Gao, H. Poisson ratio can play a crucial role in mechanical properties of biocomposites. *Mechanics of Materials* **38**, 1128 – 1142 (2006).
- [14] Timoshenko, S. P. & Gere, J. M. *Theory of Elastic Stability* (Dover Publications, 1961).
- [15] Hannezo, E., Prost, J. & Joanny, J.-F. Mechanical instabilities of biological tubes. *Physical Review Letters* **109**, 018101 (2012). URL <https://doi.org/10.1103/PhysRevLett.109.018101>.
- [16] Helfrich, W. Elastic properties of lipid bilayers: Theory and possible experiments. *Zeitschrift für Naturforschung C* **28**, 693–703 (1973). URL <https://doi.org/10.1515/znc-1973-11-1209>.



- 593 [17] Hannezo, E., Prost, J. & Joanny, J.-F. Theory of epithelial sheet morphology in three dimen-  
594 sions. *Proceedings of the National Academy of Sciences* **111**, 27–32 (2014).
- 595 [18] Bar-Ziv, R. & Moses, E. Instability and "pearling" states produced in tubular membranes by  
596 competition of curvature and tension. *Phys. Rev. Lett.* **73**, 1392–1395 (1994). URL <https://link.aps.org/doi/10.1103/PhysRevLett.73.1392>.  
597
- 598 [19] Cross, M. C. & Hohenberg, P. C. Pattern formation outside of equilibrium. *Rev. Mod. Phys.*  
599 **65**, 851–1112 (1993). URL <https://link.aps.org/doi/10.1103/RevModPhys.65.851>.
- 600 [20] Castro, A. P. G. *et al.* Combined numerical and experimental biomechanical characterization  
601 of soft collagen hydrogel substrate. *J. Mater. Sci. Mater. Med.* **27**, 79 (2016).
- 602 [21] Tinevez, J.-Y. *et al.* Role of cortical tension in bleb growth. *Proceedings of the National*  
603 *Academy of Sciences* **106**, 18581–18586 (2009).
- 604 [22] Thoumine, O., Cardoso, O. & Meister, J.-J. Changes in the mechanical properties of fibroblasts  
605 during spreading: a micromanipulation study. *European Biophysics Journal* **28**, 222–234  
606 (1999). URL <https://doi.org/10.1007/s002490050203>.
- 607 [23] Winklbauer, R. Cell adhesion strength from cortical tension - an integration of concepts. *J.*  
608 *Cell Sci.* **128**, 3687–3693 (2015).
- 609 [24] Bastounis, E. E., Ortega, F. E., Serrano, R. & Theriot, J. A. A multi-well format  
610 polyacrylamide-based assay for studying the effect of extracellular matrix stiffness on the bac-  
611 terial infection of adherent cells. *JoVE* e57361 (2018). URL <https://www.jove.com/t/57361>.
- 612 [25] Villeneuve, C. *et al.* aPKC $\alpha$  triggers basal extrusion of luminal mammary epithelial cells by  
613 tuning contractility and vinculin localization at cell junctions. *Proceedings of the National*  
614 *Academy of Sciences of the United States of America* **116**, 24108–24114 (2019). URL <https://doi.org/10.1073/pnas.1906779116>.  
615
- 616 [26] Amenzade, I. *Theory of Elasticity* (Mir, 1979).
